# Supplementary material for: Predicting enhancer transcription and activity from chromatin modifications
Source: PubMed Central journal article supplement (PMC3905895; doi:10.1093/nar/gkt826), 2013-09-12
Supplement: supp_gkt826_nar-01649-m-2013-File007.pdf [file supp_gkt826_nar-01649-m-2013-File007.pdf]

## Supplemental Figure Legends

**Supplemental Figure 1:** Histograms of the sense (a) and antisense (b) GRO-Seq data. On both strands, the histograms have a bi-modal distribution. The left and right modes correspond to enhancers with weakly and highly expressed eRNAs, respectively.

**Supplemental Figure 2:** (a) AUCs obtained using single chromatin modifications. (b) MCCs obtained using single chromatin modifications.

**Supplemental Figure 3:** Validation of enhancer activity using luciferase reporter assays. Results of triplicate luciferase assays on four subgroups of enhancers: eRNA<sup>+</sup>K27ac<sup>+</sup>, eRNA<sup>+</sup>K27ac<sup>-</sup>, eRNA<sup>-</sup>K27ac<sup>+</sup>, and eRNA<sup>-</sup>K27ac<sup>-</sup>. Relative enhancer activity is indicated as the fold enrichment over the pGL3 promoter vector.

**Supplemental Figure 4:** Scheme of nested cross validation, showing that model selection is within an inner cross-validation and therefore selected models do not see the test samples in the outer cross validation.

**Supplemental Figure 5:** Application of the logistic regression model trained on P300-bound enhancers to H3K4me1<sup>+</sup>me3<sup>-</sup> enhancers. (a) AUCs obtained using the full and top four-modification models. (b) Expression levels of genes associated with active and inactive enhancers identified by three different marks: measured eRNAs, predicted eRNAs, and H3K27ac. (c) Expression levels of the genes associated with the four classes of enhancers: eRNA<sup>+</sup>K27ac<sup>+</sup>, eRNA<sup>+</sup>K27ac<sup>-</sup>, eRNA<sup>-</sup>K27ac<sup>+</sup>, and eRNA<sup>-</sup>K27ac<sup>-</sup>.

# Supplemental Figure 1

**a**

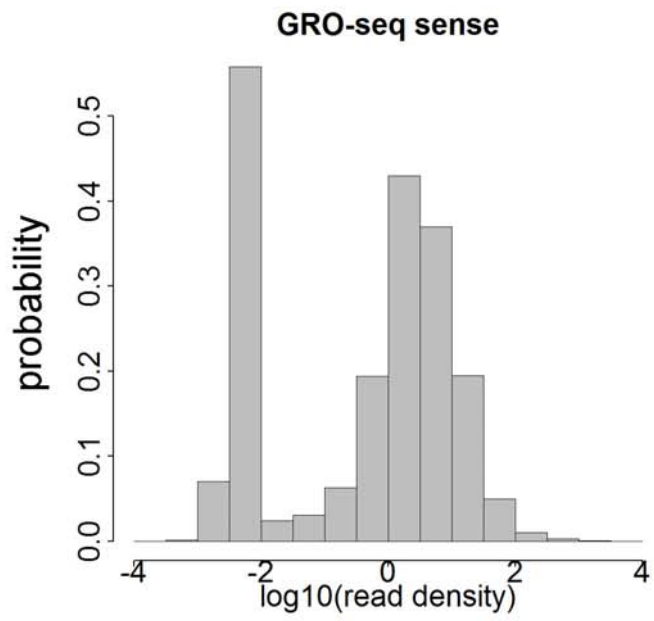

**b**

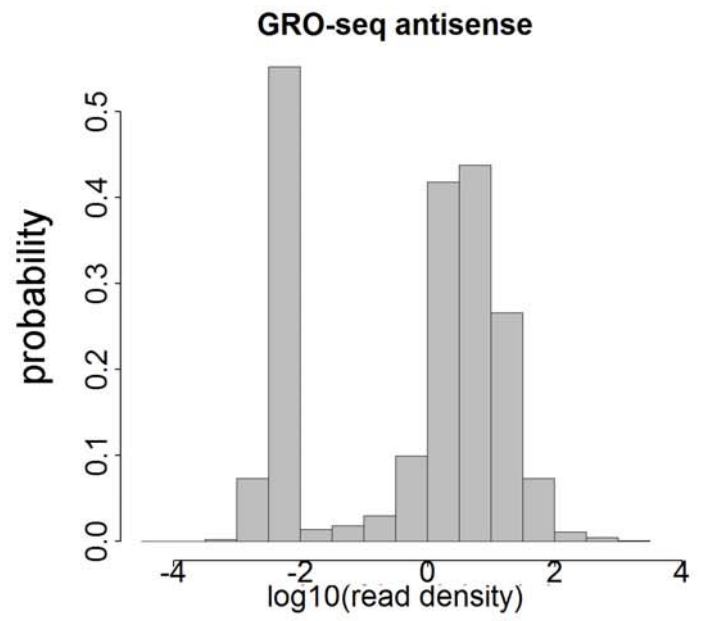

# Supplemental Figure 2

a

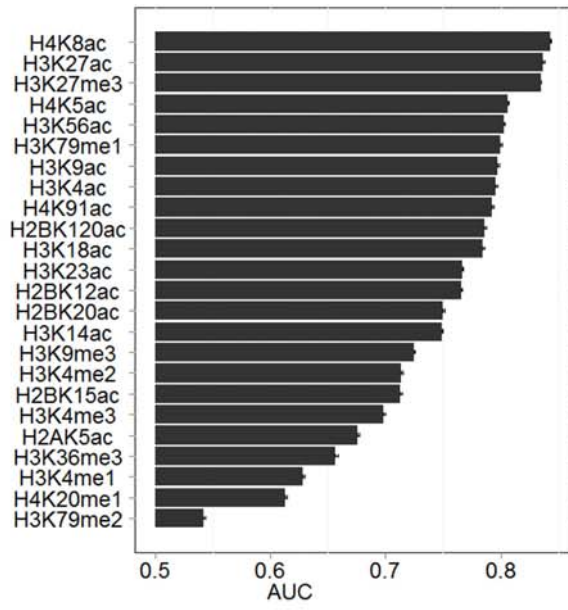

b

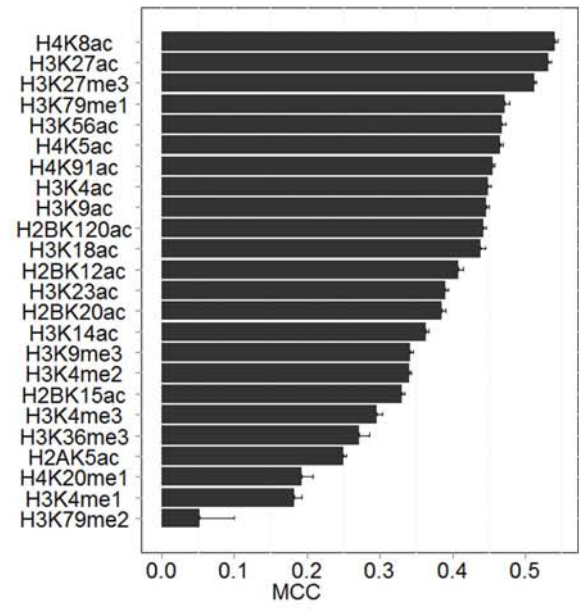

# Supplemental Figure 3

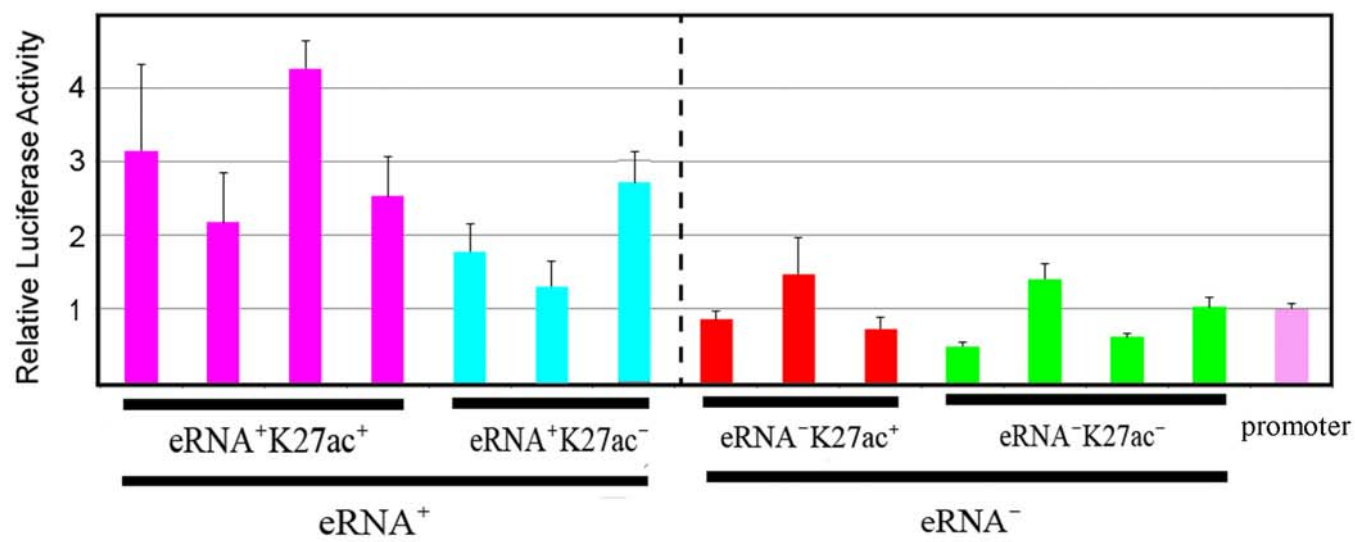

# Supplemental Figure 4

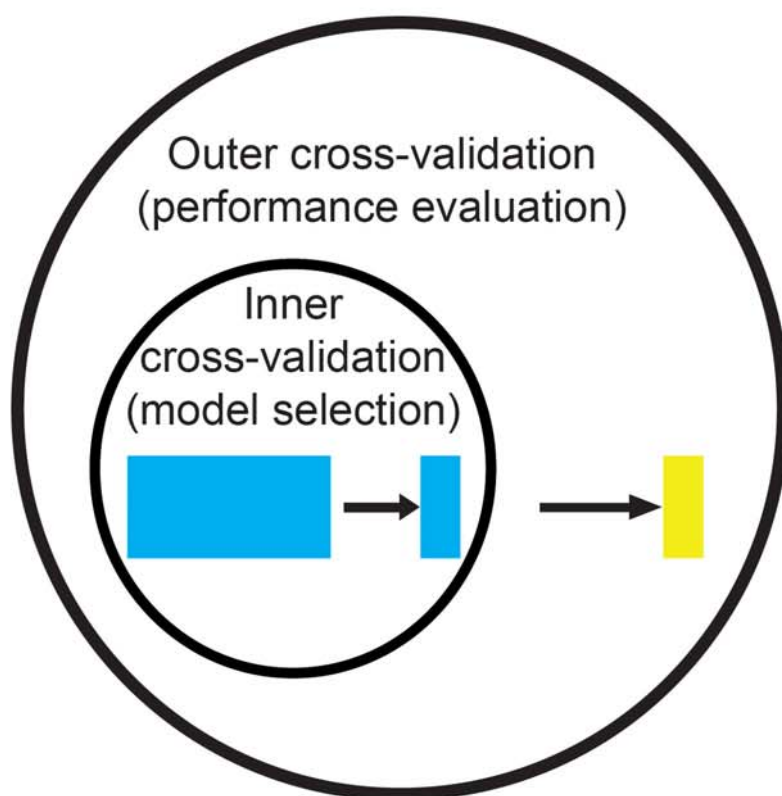

# Supplemental Figure 5

a

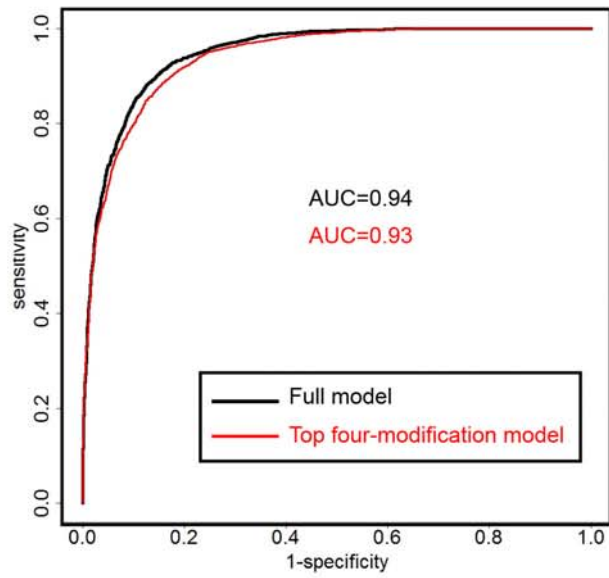

b

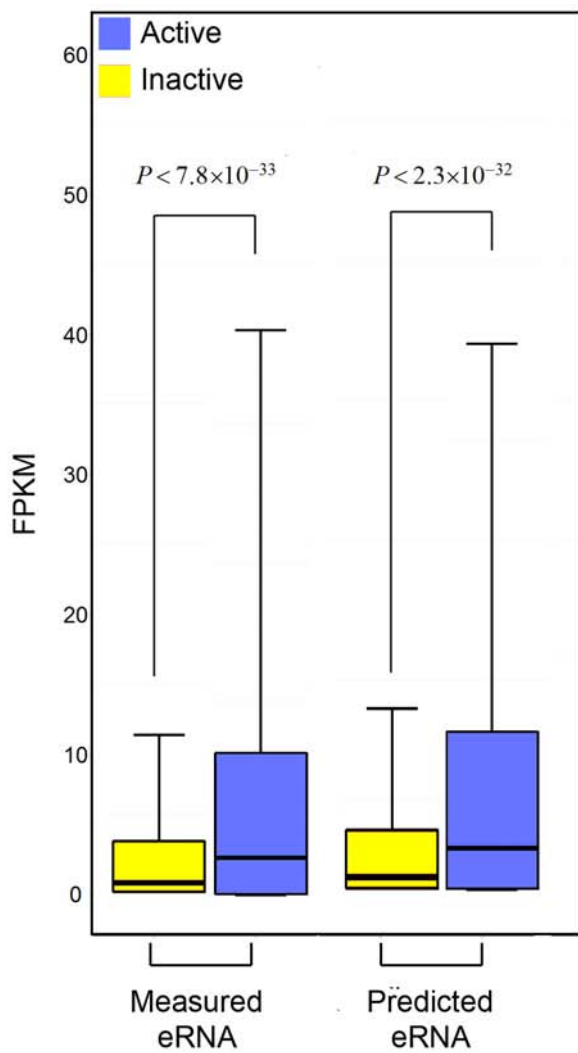

c

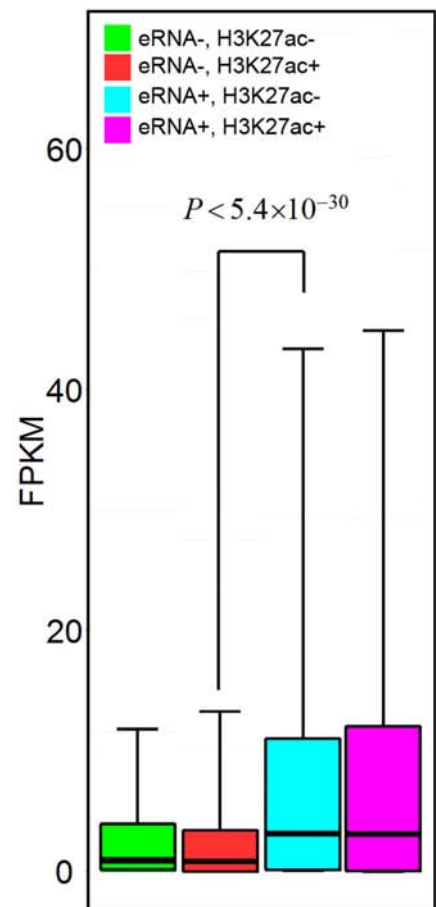

Table S1: Cell lines and chromatin marks involved in the current study

| Cell line                                         | Number of chromatin marks | List of chromatin marks                                                                                                                                                                                                      | Top four-modification model      |
|---------------------------------------------------|---------------------------|------------------------------------------------------------------------------------------------------------------------------------------------------------------------------------------------------------------------------|----------------------------------|
| IMR90 Human fetal lung fibroblast cells           | 24                        | H2AK5ac, H2BK120ac, H2BK12ac, H2BK15ac, H2BK20ac, H3K14ac, H3K18ac, H3K23ac, H3K27ac, H3K27me3, H3K36me3, H3K4ac, H3K4me1, H3K4me2, H3K4me3, H3K56ac, H3K79me1, H3K79me2, H3K9ac, H3K9me3, H4K20me1, H4K5ac, H4K8ac, H4K91ac | H3K27me3+H3K27ac+H3K79me1+H3K9ac |
| mESC mouse embryonic stem cell                    | 6                         | H3K4me1, H3K4me3, H3K27ac, H3K27me3, H3K36me3, H3K9me3                                                                                                                                                                       | H3K27ac+H3K27me3+H3K4me3+H3K9me3 |
| H1 Human embryonic stem cells, line H1            | 22                        | H2AK5ac, H2BK120ac, H2BK12ac, H2BK15ac, H2BK20ac, H3K18ac, H3K23ac, H3K27ac, H3K27me3, H3K36me3, H3K4ac, H3K4me1, H3K4me2, H3K4me3, H3K56ac, H3K79me1, H3K79me2, H3K9ac, H3K9me3, H4K20me1, H4K5ac, H4K91ac                  | H3K27me3+H3K27ac+H3K79me1+H3K9ac |
| ME H1 BMP4 derived mesendoderm cultured cells     | 12                        | H2AK5ac, H2BK120ac, H3K18ac, H3K23ac, H3K27ac, H3K27me3, H3K36me3, H3K4me1, H3K4me3, H3K79me1, H3K79me2, H3K9ac                                                                                                              | H3K27me3+H3K27ac+H3K79me1+H3K9ac |
| TB H1 BMP4 derived trophoblast cultured cells     | 17                        | H2AK5ac, H2BK120ac, H2BK12ac, H3K14ac, H3K18ac, H3K27ac, H3K27me3, H3K36me3, H3K4ac, H3K4me1, H3K4me3, H3K79me1, H3K79me2, H3K9ac, H3K9me3, H4K8ac, H4K91ac                                                                  | H3K27me3+H3K27ac+H3K79me1+H3K9ac |
| MSC H1 derived mesenchymal stem cells             | 18                        | H2AK5ac, H2BK120ac, H2BK12ac, H3K14ac, H3K18ac, H3K23ac, H3K27ac, H3K27me3, H3K36me3, H3K4ac, H3K4me1, H3K4me2, H3K4me3, H3K79me1, H3K9ac, H3K9me3, H4K8ac, H4K91ac                                                          | H3K27me3+H3K27ac+H3K79me1+H3K9ac |
| NPC H1 derived neuronal progenitor cultured cells | 16                        | H2BK12ac, H3K14ac, H3K18ac, H3K23ac, H3K27ac, H3K27me3, H3K36me3, H3K4ac, H3K4me1, H3K4me2, H3K4me3, H3K79me1, H3K9ac, H3K9me3, H4K8ac, H4K91ac                                                                              | H3K27me3+H3K27ac+H3K79me1+H3K9ac |

Table S2: List of the top 432 four-modification models and their AUCs and MCCs

| Histone Code                        | AUC      | MCC      |
|-------------------------------------|----------|----------|
| H3K27ac+H3K27me3+H3K79me1+H3K9ac    | 0.935242 | 0.712542 |
| H3K27ac+H3K27me3+H3K79me1+H4K8ac    | 0.933593 | 0.695162 |
| H3K27ac+H3K27me3+H3K4me3+H4K8ac     | 0.932496 | 0.689845 |
| H2AK5ac+H3K27me3+H3K79me1+H3K9ac    | 0.931746 | 0.704913 |
| H2BK120ac+H2BK20ac+H3K27ac+H3K27me3 | 0.931384 | 0.684509 |
| H3K18ac+H3K27me3+H3K79me1+H4K8ac    | 0.931166 | 0.698695 |
| H2BK15ac+H3K27me3+H3K79me1+H4K8ac   | 0.931038 | 0.698581 |
| H3K23ac+H3K27ac+H3K27me3+H3K4me3    | 0.930882 | 0.707214 |
| H3K27me3+H3K4me2+H3K79me1+H3K9ac    | 0.930781 | 0.7049   |
| H2BK120ac+H3K27ac+H3K27me3+H3K79me1 | 0.930752 | 0.70518  |
| H3K27ac+H3K27me3+H3K4me3+H3K9ac     | 0.930288 | 0.696054 |
| H3K27ac+H3K27me3+H3K4me3+H4K91ac    | 0.930216 | 0.696424 |
| H3K27ac+H3K27me3+H3K4me3+H3K79me1   | 0.929953 | 0.681604 |
| H3K27ac+H3K27me3+H3K4me2+H3K9ac     | 0.929931 | 0.699718 |
| H2BK120ac+H2BK20ac+H3K27me3+H3K9ac  | 0.929917 | 0.677994 |
| H3K27ac+H3K27me3+H3K4me2+H3K79me1   | 0.929868 | 0.697372 |
| H2AK5ac+H3K27ac+H3K4me3+H3K9ac      | 0.929841 | 0.678152 |
| H2AK5ac+H3K27ac+H3K27me3+H3K9ac     | 0.929825 | 0.704078 |
| H3K14ac+H3K27ac+H3K27me3+H3K4me3    | 0.929761 | 0.700875 |
| H3K27me3+H3K4ac+H3K79me1+H4K8ac     | 0.929729 | 0.69136  |
| H3K27ac+H3K27me3+H3K4me3+H3K9me3    | 0.929728 | 0.693474 |
| H3K27ac+H3K27me3+H3K79me1+H4K91ac   | 0.929706 | 0.690478 |
| H3K27ac+H3K27me3+H3K4me3+H3K56ac    | 0.92966  | 0.692095 |
| H2BK20ac+H3K27ac+H3K27me3+H3K9ac    | 0.929651 | 0.69713  |
| H3K27me3+H3K79me1+H3K9ac+H4K8ac     | 0.929544 | 0.687543 |
| H2BK15ac+H3K27ac+H3K9ac+H3K9me3     | 0.929488 | 0.688676 |
| H3K27ac+H3K4me1+H3K4me2+H3K9ac      | 0.929486 | 0.680501 |
| H2AK5ac+H3K27ac+H3K79me2+H3K9ac     | 0.92948  | 0.690429 |
| H2AK5ac+H3K27me3+H3K56ac+H3K9ac     | 0.92946  | 0.695544 |
| H2BK120ac+H3K27me3+H3K79me1+H4K8ac  | 0.929316 | 0.685618 |
| H2BK15ac+H3K27ac+H3K27me3+H3K9ac    | 0.929293 | 0.689998 |
| H3K23ac+H3K27ac+H3K27me3+H3K79me1   | 0.929275 | 0.698931 |
| H3K27ac+H3K27me3+H3K36me3+H4K8ac    | 0.929271 | 0.697761 |
| H3K27ac+H3K27me3+H3K4me2+H4K91ac    | 0.929242 | 0.698131 |
| H3K27ac+H3K4me1+H3K56ac+H3K9ac      | 0.929207 | 0.6977   |
| H3K27ac+H3K27me3+H3K4me2+H4K8ac     | 0.929038 | 0.697798 |
| H2BK12ac+H3K27ac+H3K27me3+H3K4me3   | 0.928938 | 0.694857 |
| H2BK15ac+H3K27ac+H3K4me1+H3K9ac     | 0.928912 | 0.702584 |
| H2BK15ac+H3K27me3+H3K79me1+H3K9ac   | 0.928852 | 0.69272  |
| H3K27me3+H3K56ac+H3K79me1+H4K8ac    | 0.928817 | 0.695857 |
| H2AK5ac+H3K27ac+H3K36me3+H3K9ac     | 0.928816 | 0.687835 |
| H3K23ac+H3K27me3+H3K79me1+H4K8ac    | 0.928739 | 0.693963 |
| H2AK5ac+H3K27ac+H3K79me1+H3K9ac     | 0.928647 | 0.686124 |
| H2BK20ac+H3K27ac+H3K27me3+H4K8ac    | 0.928579 | 0.679028 |
| H3K27ac+H3K27me3+H3K79me1+H3K9me3   | 0.928494 | 0.701889 |
| H3K18ac+H3K27me3+H3K4me3+H3K79me1   | 0.92845  | 0.708629 |



|                                    |          |          |
|------------------------------------|----------|----------|
| H2AK5ac+H3K27ac+H3K9ac+H3K9me3     | 0.928436 | 0.696407 |
| H3K27ac+H3K4me1+H3K9ac+H3K9me3     | 0.928411 | 0.686931 |
| H3K27ac+H3K27me3+H3K79me1+H3K79me2 | 0.928352 | 0.684153 |
| H3K27me3+H3K4me2+H4K5ac+H4K8ac     | 0.928325 | 0.69335  |
| H3K27ac+H3K4me1+H3K4me3+H3K9ac     | 0.928294 | 0.689874 |
| H3K27me3+H3K4me3+H3K79me1+H4K8ac   | 0.928101 | 0.703252 |
| H3K27ac+H3K4me1+H3K9ac+H4K8ac      | 0.928059 | 0.682859 |
| H2BK12ac+H3K27ac+H3K4me1+H3K9ac    | 0.927944 | 0.694812 |
| H3K23ac+H3K27me3+H3K79me1+H3K79me2 | 0.927925 | 0.685082 |
| H3K18ac+H3K27ac+H3K27me3+H4K8ac    | 0.92792  | 0.688897 |
| H3K27ac+H3K27me3+H3K56ac+H3K79me1  | 0.927912 | 0.696505 |
| H3K27ac+H3K27me3+H3K56ac+H4K8ac    | 0.927906 | 0.698417 |
| H2BK15ac+H3K27ac+H3K27me3+H3K4me3  | 0.927895 | 0.69314  |
| H3K27ac+H3K4me1+H3K79me1+H3K9ac    | 0.927867 | 0.690399 |
| H2AK5ac+H3K27ac+H3K27me3+H3K79me1  | 0.927845 | 0.694666 |
| H2AK5ac+H3K27ac+H3K27me3+H4K8ac    | 0.927834 | 0.685701 |
| H2BK12ac+H3K27me3+H3K79me1+H3K9ac  | 0.927813 | 0.694665 |
| H3K27me3+H3K4me3+H3K79me1+H3K9ac   | 0.927763 | 0.687251 |
| H2AK5ac+H3K27ac+H3K4me1+H3K9ac     | 0.927752 | 0.695254 |
| H3K27me3+H3K4me1+H3K79me1+H4K8ac   | 0.927705 | 0.710103 |
| H3K27me3+H3K79me1+H4K8ac+H4K91ac   | 0.927682 | 0.685149 |
| H3K27me3+H3K4me3+H3K79me1+H4K5ac   | 0.927681 | 0.694319 |
| H3K27ac+H3K27me3+H3K9ac+H4K91ac    | 0.927668 | 0.6826   |
| H2AK5ac+H3K27me3+H3K79me1+H4K8ac   | 0.927666 | 0.675337 |
| H3K27ac+H3K4me1+H3K56ac+H4K8ac     | 0.927661 | 0.694553 |
| H2AK5ac+H3K27ac+H3K9ac+H4K20me1    | 0.927548 | 0.67914  |
| H3K27ac+H3K27me3+H3K4me3+H4K5ac    | 0.927513 | 0.706736 |
| H2BK12ac+H3K27ac+H3K27me3+H4K8ac   | 0.927459 | 0.690806 |
| H2BK120ac+H3K27ac+H3K27me3+H3K4me3 | 0.927411 | 0.687929 |
| H3K27me3+H3K4me1+H3K79me1+H3K9ac   | 0.927264 | 0.695756 |
| H3K27me3+H3K79me1+H3K9ac+H4K91ac   | 0.927263 | 0.682803 |
| H3K27ac+H3K27me3+H3K4ac+H3K79me1   | 0.927255 | 0.694502 |
| H2BK15ac+H3K4me2+H3K9ac+H4K8ac     | 0.927213 | 0.68952  |
| H2BK12ac+H3K27ac+H3K27me3+H3K79me1 | 0.927162 | 0.696625 |
| H3K27ac+H3K27me3+H3K79me1+H4K20me1 | 0.92711  | 0.699796 |
| H3K27ac+H3K27me3+H3K4me1+H3K79me1  | 0.927096 | 0.691133 |
| H2AK5ac+H3K27me3+H3K4ac+H3K9ac     | 0.927089 | 0.675546 |
| H3K27ac+H3K27me3+H3K4me3+H4K20me1  | 0.927052 | 0.692386 |
| H2BK12ac+H3K27me3+H3K4me2+H3K79me1 | 0.927051 | 0.679641 |
| H2BK12ac+H3K27me3+H3K79me1+H4K8ac  | 0.927051 | 0.697485 |
| H3K27ac+H3K79me1+H3K9me3+H4K8ac    | 0.927024 | 0.694588 |
| H3K14ac+H3K27me3+H3K79me1+H3K9ac   | 0.927008 | 0.6788   |
| H3K27me3+H3K56ac+H3K79me1+H3K9ac   | 0.92699  | 0.694356 |
| H3K27ac+H3K27me3+H3K36me3+H3K4me3  | 0.926987 | 0.685538 |
| H2AK5ac+H3K27ac+H3K79me1+H4K8ac    | 0.926972 | 0.69254  |
| H3K27me3+H3K79me1+H3K79me2+H4K8ac  | 0.926962 | 0.699292 |
| H3K27ac+H3K27me3+H3K4ac+H3K9ac     | 0.926957 | 0.682854 |
| H2BK120ac+H3K27ac+H3K27me3+H3K9ac  | 0.926954 | 0.700993 |
| H3K27ac+H3K4me1+H3K79me1+H4K8ac    | 0.926946 | 0.678918 |
| H3K23ac+H3K27me3+H3K4me1+H3K79me1  | 0.926946 | 0.689394 |
| H2AK5ac+H3K27me3+H3K9ac+H4K91ac    | 0.926937 | 0.667853 |

|                                      |          |          |
|--------------------------------------|----------|----------|
| H2BK15ac+H3K27ac+H3K27me3+H3K79me1   | 0.926927 | 0.690899 |
| H3K27ac+H3K27me3+H3K4me2+H3K56ac     | 0.926878 | 0.699669 |
| H3K27ac+H3K4me2+H3K9me3+H4K8ac       | 0.926732 | 0.680161 |
| H2AK5ac+H3K27me3+H3K79me1+H4K5ac     | 0.926732 | 0.692423 |
| H2BK20ac+H3K27me3+H3K4me3+H3K79me1   | 0.926731 | 0.686929 |
| H2BK20ac+H3K27me3+H3K79me1+H3K9ac    | 0.926715 | 0.700774 |
| H2BK20ac+H3K27ac+H3K36me3+H4K8ac     | 0.926712 | 0.680506 |
| H2BK15ac+H3K27ac+H3K27me3+H3K4me2    | 0.926668 | 0.691365 |
| H3K27me3+H3K4me2+H3K56ac+H3K79me1    | 0.926639 | 0.698261 |
| H2BK20ac+H3K27me3+H3K4me2+H3K9ac     | 0.926662 | 0.676823 |
| H3K27me3+H3K4me1+H3K79me1+H4K5ac     | 0.926613 | 0.680552 |
| H3K27ac+H3K27me3+H3K4ac+H3K4me3      | 0.926605 | 0.695099 |
| H3K23ac+H3K27me3+H3K4me2+H3K79me1    | 0.92658  | 0.693553 |
| H2AK5ac+H3K27me3+H3K4me2+H3K9ac      | 0.926562 | 0.686713 |
| H3K23ac+H3K27ac+H3K27me3+H3K4me2     | 0.926557 | 0.701068 |
| H3K27ac+H3K9me3+H4K8ac+H4K91ac       | 0.926551 | 0.686003 |
| H3K27ac+H3K27me3+H3K4me2+H4K5ac      | 0.926499 | 0.696772 |
| H2BK120ac+H3K27me3+H3K79me1+H4K20me1 | 0.926492 | 0.685653 |
| H2BK120ac+H3K27me3+H3K79me1+H3K9ac   | 0.926491 | 0.698269 |
| H2BK20ac+H3K27ac+H3K9me3+H4K8ac      | 0.926476 | 0.68503  |
| H2BK120ac+H3K27ac+H3K27me3+H3K9me3   | 0.926442 | 0.667443 |
| H3K27ac+H3K27me3+H3K4me1+H4K8ac      | 0.926424 | 0.697574 |
| H3K18ac+H3K27me3+H3K79me1+H3K9ac     | 0.926383 | 0.690359 |
| H3K27me3+H3K4me2+H3K79me1+H4K5ac     | 0.926378 | 0.695336 |
| H3K27me3+H3K79me1+H3K9me3+H4K8ac     | 0.926338 | 0.696323 |
| H3K27me3+H3K4me2+H3K79me1+H4K8ac     | 0.926332 | 0.683303 |
| H3K27ac+H3K27me3+H3K36me3+H3K79me1   | 0.926331 | 0.694248 |
| H3K27ac+H3K27me3+H3K4me2+H3K4me3     | 0.926317 | 0.698676 |
| H3K27ac+H3K27me3+H3K9ac+H3K9me3      | 0.926291 | 0.688608 |
| H2BK20ac+H3K27me3+H3K79me1+H4K8ac    | 0.92626  | 0.69587  |
| H2BK120ac+H3K27me3+H3K79me1+H4K5ac   | 0.926256 | 0.681392 |
| H3K23ac+H3K27ac+H3K4me1+H3K4me3      | 0.926239 | 0.687928 |
| H2BK20ac+H3K27ac+H3K27me3+H3K4me2    | 0.926227 | 0.694428 |
| H3K27ac+H3K4me1+H3K56ac+H3K79me1     | 0.926217 | 0.693329 |
| H3K18ac+H3K27ac+H3K27me3+H3K4me3     | 0.926195 | 0.680226 |
| H3K14ac+H3K27me3+H3K79me1+H4K8ac     | 0.926175 | 0.68284  |
| H3K27me3+H3K4me2+H3K79me1+H4K91ac    | 0.926103 | 0.70466  |
| H3K14ac+H3K27ac+H3K27me3+H3K9me3     | 0.926068 | 0.691423 |
| H2AK5ac+H3K27ac+H3K4me2+H3K9ac       | 0.926038 | 0.685063 |
| H3K27ac+H3K27me3+H3K36me3+H3K4me2    | 0.926016 | 0.69317  |
| H3K27ac+H3K4ac+H3K9ac+H3K9me3        | 0.926007 | 0.682464 |
| H2BK15ac+H2BK20ac+H3K27me3+H3K79me1  | 0.926006 | 0.68339  |
| H3K27ac+H3K27me3+H3K79me1+H4K5ac     | 0.925996 | 0.680719 |
| H2BK15ac+H3K23ac+H3K27me3+H3K79me1   | 0.92598  | 0.691826 |
| H2BK120ac+H3K18ac+H3K27me3+H3K79me1  | 0.925954 | 0.674795 |
| H2AK5ac+H3K27ac+H3K9me3+H4K8ac       | 0.925946 | 0.694195 |
| H3K27ac+H3K4me1+H3K56ac+H4K5ac       | 0.925945 | 0.676377 |
| H2BK120ac+H3K27ac+H3K27me3+H4K8ac    | 0.925933 | 0.692068 |
| H3K27ac+H3K27me3+H3K9ac+H4K8ac       | 0.925925 | 0.693621 |
| H3K27me3+H3K4me3+H4K5ac+H4K8ac       | 0.925921 | 0.699477 |
| H3K18ac+H3K27me3+H3K56ac+H3K79me1    | 0.925912 | 0.685189 |

|                                      |          |          |
|--------------------------------------|----------|----------|
| H2BK15ac+H3K27ac+H3K27me3+H4K8ac     | 0.925911 | 0.696544 |
| H3K27ac+H3K4me3+H3K9ac+H4K8ac        | 0.925902 | 0.681756 |
| H3K27me3+H3K4me3+H3K79me1+H4K91ac    | 0.925838 | 0.696099 |
| H2BK120ac+H3K27me3+H3K4ac+H3K79me1   | 0.925833 | 0.687175 |
| H3K14ac+H3K27ac+H3K27me3+H3K4me2     | 0.925815 | 0.695373 |
| H3K27ac+H3K27me3+H3K4ac+H3K4me2      | 0.925796 | 0.688677 |
| H3K27ac+H3K27me3+H3K56ac+H3K9ac      | 0.925784 | 0.682278 |
| H3K27me3+H3K4ac+H3K4me2+H3K79me1     | 0.925779 | 0.688394 |
| H3K18ac+H3K27me3+H3K79me1+H3K79me2   | 0.925756 | 0.686152 |
| H3K23ac+H3K27me3+H3K79me1+H4K91ac    | 0.925728 | 0.681273 |
| H3K27me3+H3K79me1+H3K9ac+H3K9me3     | 0.92571  | 0.675607 |
| H3K27me3+H3K79me1+H4K20me1+H4K8ac    | 0.92564  | 0.688147 |
| H3K27ac+H3K27me3+H3K4me3+H3K79me2    | 0.925621 | 0.678433 |
| H2BK20ac+H3K18ac+H3K27me3+H3K79me1   | 0.925588 | 0.679607 |
| H3K23ac+H3K27ac+H3K4me1+H3K9ac       | 0.925575 | 0.675906 |
| H3K27me3+H3K79me1+H3K9ac+H4K5ac      | 0.925572 | 0.677889 |
| H2BK120ac+H3K18ac+H3K27ac+H3K27me3   | 0.925557 | 0.695109 |
| H2BK20ac+H3K27ac+H3K27me3+H3K4me3    | 0.925555 | 0.703964 |
| H2BK120ac+H3K23ac+H3K27me3+H3K9ac    | 0.925545 | 0.681237 |
| H3K14ac+H3K27ac+H3K27me3+H3K9ac      | 0.925492 | 0.688299 |
| H2BK120ac+H3K27me3+H3K4me2+H3K79me1  | 0.925472 | 0.694936 |
| H2AK5ac+H3K79me1+H3K9ac+H4K20me1     | 0.925467 | 0.679061 |
| H2BK20ac+H3K27ac+H3K4me3+H4K8ac      | 0.92546  | 0.68438  |
| H3K27me3+H3K36me3+H3K79me1+H4K5ac    | 0.925421 | 0.686836 |
| H3K27ac+H3K27me3+H4K8ac+H4K91ac      | 0.925418 | 0.681253 |
| H3K23ac+H3K27me3+H3K79me1+H4K5ac     | 0.925405 | 0.679492 |
| H2BK120ac+H3K27ac+H3K9me3+H4K8ac     | 0.925358 | 0.683152 |
| H3K27ac+H3K4me2+H3K9ac+H3K9me3       | 0.925318 | 0.697102 |
| H2BK15ac+H3K27me3+H3K79me1+H4K91ac   | 0.925313 | 0.6824   |
| H2AK5ac+H3K23ac+H3K27ac+H3K27me3     | 0.925296 | 0.692367 |
| H3K27ac+H3K27me3+H4K5ac+H4K8ac       | 0.925262 | 0.693883 |
| H2AK5ac+H3K27ac+H4K20me1+H4K8ac      | 0.925259 | 0.676344 |
| H3K27me3+H3K79me1+H3K9ac+H4K20me1    | 0.925256 | 0.681841 |
| H3K27me3+H3K79me1+H3K79me2+H4K5ac    | 0.925239 | 0.678837 |
| H3K23ac+H3K27me3+H3K36me3+H3K79me1   | 0.925233 | 0.689525 |
| H3K23ac+H3K27me3+H3K4ac+H3K79me1     | 0.925205 | 0.688429 |
| H2BK120ac+H2BK12ac+H3K27me3+H3K79me1 | 0.925198 | 0.679627 |
| H3K27me3+H3K79me1+H3K9me3+H4K91ac    | 0.925182 | 0.687039 |
| H3K27ac+H3K4me1+H3K9ac+H4K20me1      | 0.925168 | 0.68368  |
| H3K27ac+H3K4me1+H3K9ac+H4K5ac        | 0.925166 | 0.678978 |
| H3K14ac+H3K27me3+H3K79me1+H4K91ac    | 0.925156 | 0.690702 |
| H3K23ac+H3K27me3+H3K79me1+H3K9ac     | 0.925136 | 0.680056 |
| H2AK5ac+H3K56ac+H3K79me1+H3K9ac      | 0.925115 | 0.690911 |
| H2BK120ac+H3K27ac+H3K27me3+H3K4me1   | 0.925089 | 0.685426 |
| H2BK12ac+H3K27me3+H3K79me1+H4K91ac   | 0.924979 | 0.693712 |
| H3K27ac+H3K27me3+H3K9me3+H4K8ac      | 0.924978 | 0.692836 |
| H2AK5ac+H3K27me3+H3K4me2+H4K91ac     | 0.924948 | 0.679812 |
| H2BK15ac+H3K27ac+H3K4me3+H4K8ac      | 0.924948 | 0.695074 |
| H2BK12ac+H3K27ac+H3K4me3+H4K8ac      | 0.924918 | 0.680994 |
| H3K27ac+H3K27me3+H3K9ac+H4K5ac       | 0.924917 | 0.683392 |
| H3K27ac+H3K4me3+H3K9ac+H4K20me1      | 0.924907 | 0.675206 |

|                                      |          |          |
|--------------------------------------|----------|----------|
| H2BK120ac+H3K27me3+H3K79me1+H4K91ac  | 0.924901 | 0.679942 |
| H3K27ac+H3K27me3+H3K4me2+H3K79me2    | 0.924895 | 0.676399 |
| H3K23ac+H3K27ac+H3K4me1+H3K9me3      | 0.924888 | 0.686212 |
| H2BK15ac+H3K27me3+H3K4me2+H3K9ac     | 0.924869 | 0.684937 |
| H3K27ac+H3K27me3+H3K4me1+H3K9ac      | 0.92484  | 0.699157 |
| H2AK5ac+H3K79me1+H3K9ac+H4K91ac      | 0.924825 | 0.677279 |
| H3K18ac+H3K23ac+H3K27me3+H3K79me1    | 0.924816 | 0.677257 |
| H2BK12ac+H3K27me3+H3K4me3+H3K9ac     | 0.92481  | 0.677761 |
| H3K27ac+H3K27me3+H3K4me1+H3K4me3     | 0.924764 | 0.690351 |
| H2AK5ac+H3K27ac+H3K4me2+H4K8ac       | 0.924743 | 0.689052 |
| H3K27me3+H3K79me1+H4K5ac+H4K8ac      | 0.924738 | 0.693542 |
| H2BK120ac+H3K27ac+H3K4me1+H3K9ac     | 0.924726 | 0.680699 |
| H2BK20ac+H3K23ac+H3K27ac+H3K27me3    | 0.924705 | 0.695386 |
| H3K27me3+H3K79me1+H4K5ac+H4K91ac     | 0.924705 | 0.680923 |
| H2BK20ac+H3K27ac+H3K4me1+H4K8ac      | 0.924703 | 0.676654 |
| H3K27me3+H3K4me1+H3K4me2+H4K5ac      | 0.924684 | 0.676998 |
| H2BK12ac+H3K27ac+H3K27me3+H3K4me2    | 0.924645 | 0.687248 |
| H3K14ac+H3K27me3+H3K36me3+H3K79me1   | 0.924635 | 0.678431 |
| H3K27ac+H3K9ac+H3K9me3+H4K8ac        | 0.92459  | 0.685092 |
| H2BK120ac+H2BK20ac+H3K27me3+H3K79me1 | 0.924563 | 0.682763 |
| H3K27ac+H3K4me2+H3K56ac+H4K8ac       | 0.92454  | 0.678818 |
| H3K14ac+H3K18ac+H3K27me3+H3K79me1    | 0.924533 | 0.675876 |
| H3K18ac+H3K27me3+H3K79me1+H4K5ac     | 0.924533 | 0.680992 |
| H2BK12ac+H3K23ac+H3K27ac+H3K27me3    | 0.924485 | 0.676275 |
| H2AK5ac+H2BK12ac+H3K27ac+H3K79me1    | 0.924481 | 0.692679 |
| H3K18ac+H3K27me3+H3K4me3+H3K9ac      | 0.924476 | 0.677192 |
| H3K27me3+H3K4me3+H4K5ac+H4K91ac      | 0.92447  | 0.677226 |
| H2AK5ac+H3K27ac+H3K27me3+H3K56ac     | 0.924438 | 0.689403 |
| H2BK20ac+H3K27me3+H3K79me1+H4K5ac    | 0.924425 | 0.676472 |
| H2BK15ac+H3K27ac+H4K20me1+H4K8ac     | 0.924411 | 0.676487 |
| H2AK5ac+H3K27ac+H3K4me3+H4K8ac       | 0.924382 | 0.678144 |
| H2BK12ac+H3K27me3+H3K56ac+H3K79me1   | 0.924374 | 0.676552 |
| H3K27ac+H3K27me3+H3K4me2+H4K20me1    | 0.924369 | 0.675147 |
| H3K27ac+H3K27me3+H3K79me2+H4K8ac     | 0.924359 | 0.683677 |
| H3K14ac+H3K23ac+H3K27me3+H3K79me1    | 0.924342 | 0.686164 |
| H3K23ac+H3K27ac+H3K9me3+H4K8ac       | 0.924338 | 0.682002 |
| H2AK5ac+H3K27me3+H3K4me2+H3K79me1    | 0.92431  | 0.687094 |
| H3K27ac+H3K4me3+H3K56ac+H4K8ac       | 0.924307 | 0.683309 |
| H2BK15ac+H3K27me3+H3K4me3+H4K5ac     | 0.924303 | 0.697837 |
| H2AK5ac+H3K14ac+H3K27ac+H3K27me3     | 0.924301 | 0.677467 |
| H2AK5ac+H3K27ac+H3K27me3+H3K4ac      | 0.924298 | 0.684768 |
| H2AK5ac+H3K23ac+H3K27me3+H3K79me1    | 0.924297 | 0.688514 |
| H2BK120ac+H3K18ac+H3K27me3+H3K9ac    | 0.924291 | 0.665058 |
| H3K27me3+H3K4ac+H3K4me3+H4K5ac       | 0.924288 | 0.686834 |
| H2AK5ac+H2BK20ac+H3K79me1+H3K9ac     | 0.924251 | 0.678987 |
| H2AK5ac+H3K27ac+H3K27me3+H3K4me2     | 0.924228 | 0.678892 |
| H3K18ac+H3K27me3+H3K4me2+H3K79me1    | 0.924214 | 0.685644 |
| H2AK5ac+H3K79me1+H3K9ac+H4K8ac       | 0.924213 | 0.680442 |
| H2AK5ac+H3K27ac+H3K79me2+H4K8ac      | 0.924205 | 0.696128 |
| H3K27me3+H3K79me1+H3K79me2+H4K91ac   | 0.924204 | 0.675326 |
| H3K27ac+H3K4me2+H4K8ac+H4K91ac       | 0.924187 | 0.68228  |

|                                      |          |          |
|--------------------------------------|----------|----------|
| H2BK20ac+H3K14ac+H3K27me3+H3K79me1   | 0.924187 | 0.681766 |
| H2BK120ac+H3K23ac+H3K27me3+H3K79me1  | 0.924187 | 0.684581 |
| H3K27ac+H3K4me3+H3K9ac+H3K9me3       | 0.924151 | 0.695053 |
| H3K27ac+H3K27me3+H3K56ac+H4K5ac      | 0.924121 | 0.696094 |
| H3K18ac+H3K27ac+H3K4me1+H3K56ac      | 0.924069 | 0.68087  |
| H3K14ac+H3K27ac+H3K4me1+H3K79me1     | 0.924061 | 0.681809 |
| H3K27ac+H3K27me3+H3K4ac+H3K4me1      | 0.924053 | 0.686385 |
| H3K27ac+H3K4me1+H3K79me2+H3K9ac      | 0.924051 | 0.674    |
| H3K18ac+H3K27me3+H3K79me1+H3K9me3    | 0.924045 | 0.68158  |
| H3K27ac+H3K4ac+H3K4me1+H3K79me1      | 0.924037 | 0.683438 |
| H2BK120ac+H3K27me3+H3K36me3+H3K79me1 | 0.924022 | 0.681344 |
| H3K27me3+H3K4ac+H3K4me3+H3K79me1     | 0.924009 | 0.687167 |
| H2BK12ac+H3K27me3+H3K36me3+H3K79me1  | 0.923996 | 0.683484 |
| H3K27ac+H3K4me1+H3K56ac+H4K91ac      | 0.923996 | 0.677589 |
| H3K27ac+H3K79me2+H3K9me3+H4K8ac      | 0.923996 | 0.695645 |
| H2AK5ac+H2BK20ac+H3K27me3+H3K79me1   | 0.923994 | 0.682015 |
| H2AK5ac+H3K27me3+H3K4me2+H4K5ac      | 0.92399  | 0.691988 |
| H3K27me3+H3K4me2+H3K79me1+H4K20me1   | 0.923976 | 0.682227 |
| H3K27ac+H3K4me2+H3K9ac+H4K8ac        | 0.923974 | 0.680082 |
| H2AK5ac+H3K27me3+H3K79me1+H4K91ac    | 0.923959 | 0.69229  |
| H3K27ac+H3K4me3+H3K9me3+H4K8ac       | 0.923933 | 0.686083 |
| H3K14ac+H3K27ac+H3K9ac+H3K9me3       | 0.923931 | 0.677164 |
| H3K27me3+H3K4me2+H3K79me2+H4K5ac     | 0.92392  | 0.67956  |
| H3K27me3+H3K4me3+H4K20me1+H4K5ac     | 0.923889 | 0.69529  |
| H3K27ac+H3K36me3+H3K4me2+H4K8ac      | 0.923884 | 0.680753 |
| H3K23ac+H3K27ac+H3K4me3+H4K8ac       | 0.923879 | 0.677165 |
| H3K27me3+H3K36me3+H3K79me1+H4K91ac   | 0.923878 | 0.684274 |
| H3K27me3+H3K4me3+H3K9ac+H4K5ac       | 0.923857 | 0.677908 |
| H2BK20ac+H3K4me2+H3K9ac+H4K8ac       | 0.92385  | 0.674924 |
| H3K18ac+H3K27me3+H3K4me2+H4K8ac      | 0.923846 | 0.683711 |
| H2BK15ac+H3K79me1+H3K9ac+H4K8ac      | 0.923833 | 0.679789 |
| H2AK5ac+H3K27ac+H3K4me1+H4K8ac       | 0.923829 | 0.679037 |
| H2AK5ac+H3K27me3+H3K4me3+H3K9ac      | 0.923828 | 0.681829 |
| H2AK5ac+H3K79me1+H3K9ac+H4K5ac       | 0.923811 | 0.67404  |
| H3K27ac+H3K4ac+H3K4me1+H4K8ac        | 0.92381  | 0.677755 |
| H2BK20ac+H3K27me3+H3K4me2+H3K79me1   | 0.923783 | 0.685743 |
| H2BK120ac+H3K14ac+H3K27me3+H3K79me1  | 0.923757 | 0.679638 |
| H2BK12ac+H3K27ac+H3K79me1+H4K8ac     | 0.923753 | 0.685622 |
| H2BK12ac+H3K18ac+H3K27me3+H3K79me1   | 0.923728 | 0.686035 |
| H3K27me3+H3K4me2+H3K56ac+H4K5ac      | 0.923723 | 0.677629 |
| H3K27ac+H3K9me3+H4K20me1+H4K8ac      | 0.923716 | 0.687306 |
| H2BK120ac+H3K27ac+H3K27me3+H3K4me2   | 0.923709 | 0.68843  |
| H3K27ac+H3K27me3+H3K36me3+H3K9ac     | 0.923664 | 0.674358 |
| H3K18ac+H3K27ac+H3K4me2+H4K8ac       | 0.923636 | 0.672931 |
| H3K27ac+H3K4me1+H3K79me1+H4K91ac     | 0.923634 | 0.678629 |
| H2BK15ac+H3K27ac+H3K79me1+H4K8ac     | 0.923631 | 0.675758 |
| H3K18ac+H3K27ac+H3K27me3+H3K9ac      | 0.923628 | 0.687197 |
| H2BK15ac+H3K27ac+H3K4me2+H3K9ac      | 0.923628 | 0.692832 |
| H3K23ac+H3K27me3+H3K56ac+H3K79me1    | 0.923625 | 0.679511 |
| H2BK12ac+H3K27me3+H3K79me1+H4K5ac    | 0.923618 | 0.684991 |
| H2BK120ac+H3K27ac+H3K4me3+H3K9me3    | 0.923617 | 0.683991 |

|                                     |          |          |
|-------------------------------------|----------|----------|
| H2AK5ac+H3K27me3+H3K9ac+H4K8ac      | 0.923609 | 0.660478 |
| H3K14ac+H3K27me3+H3K4me2+H4K5ac     | 0.923594 | 0.68081  |
| H2BK12ac+H3K27ac+H3K4me2+H3K9ac     | 0.92357  | 0.688845 |
| H3K27ac+H3K4me1+H3K4me2+H4K91ac     | 0.923545 | 0.681915 |
| H2BK15ac+H3K27ac+H3K9ac+H4K20me1    | 0.923543 | 0.673991 |
| H3K14ac+H3K27me3+H3K4me2+H3K9ac     | 0.923536 | 0.691677 |
| H3K27ac+H3K4ac+H3K9me3+H4K8ac       | 0.923516 | 0.674643 |
| H2BK120ac+H3K27me3+H3K4me3+H3K79me1 | 0.923515 | 0.680795 |
| H2BK20ac+H3K23ac+H3K27me3+H3K79me1  | 0.923508 | 0.688782 |
| H3K27me3+H3K4ac+H3K4me3+H3K9ac      | 0.923493 | 0.678854 |
| H3K27ac+H3K4me1+H3K9me3+H4K8ac      | 0.923483 | 0.686097 |
| H3K18ac+H3K27ac+H3K27me3+H3K4me2    | 0.923478 | 0.686156 |
| H2BK120ac+H3K27me3+H3K4me3+H4K5ac   | 0.923475 | 0.692347 |
| H2BK20ac+H3K27me3+H3K4ac+H3K79me1   | 0.923473 | 0.693594 |
| H3K14ac+H3K27ac+H3K4me3+H3K9me3     | 0.923467 | 0.678689 |
| H3K27ac+H3K27me3+H3K4me2+H3K9me3    | 0.92346  | 0.694206 |
| H3K27ac+H3K4ac+H3K79me1+H4K8ac      | 0.923404 | 0.686376 |
| H3K27me3+H3K4me3+H3K9me3+H4K5ac     | 0.923394 | 0.681421 |
| H3K27me3+H3K56ac+H3K79me1+H4K91ac   | 0.923377 | 0.685533 |
| H3K18ac+H3K27ac+H3K4me1+H4K8ac      | 0.923293 | 0.685786 |
| H3K27ac+H3K9ac+H3K9me3+H4K20me1     | 0.923275 | 0.675427 |
| H3K27ac+H3K27me3+H3K79me2+H3K9ac    | 0.923232 | 0.680861 |
| H2BK12ac+H3K23ac+H3K27me3+H3K79me1  | 0.923214 | 0.679947 |
| H2BK120ac+H3K27ac+H3K27me3+H4K5ac   | 0.923167 | 0.68383  |
| H3K27ac+H3K4ac+H3K4me1+H3K56ac      | 0.923162 | 0.676219 |
| H2BK20ac+H3K27me3+H3K4me3+H3K9ac    | 0.923161 | 0.685769 |
| H2BK120ac+H3K27ac+H3K27me3+H3K56ac  | 0.923129 | 0.678966 |
| H3K27me3+H3K4me2+H3K4me3+H3K9ac     | 0.92312  | 0.677141 |
| H3K23ac+H3K27ac+H3K4me1+H3K4me2     | 0.923061 | 0.683625 |
| H2BK120ac+H3K27ac+H3K27me3+H3K36me3 | 0.923049 | 0.653178 |
| H2BK120ac+H3K27ac+H3K4me1+H3K79me1  | 0.923014 | 0.676966 |
| H3K14ac+H3K27ac+H3K9me3+H4K8ac      | 0.923001 | 0.676592 |
| H3K14ac+H3K27me3+H3K4me1+H3K79me1   | 0.922989 | 0.676051 |
| H2BK12ac+H2BK15ac+H3K27me3+H3K79me1 | 0.92294  | 0.686606 |
| H2AK5ac+H2BK120ac+H3K27me3+H3K79me1 | 0.922931 | 0.681271 |
| H3K23ac+H3K27ac+H3K27me3+H3K36me3   | 0.922915 | 0.677606 |
| H2BK15ac+H3K27me3+H3K79me1+H4K5ac   | 0.922896 | 0.686593 |
| H3K27me3+H3K79me1+H4K20me1+H4K91ac  | 0.922891 | 0.6837   |
| H3K27me3+H3K4ac+H3K4me1+H3K79me1    | 0.922876 | 0.673333 |
| H3K23ac+H3K27me3+H3K79me1+H4K20me1  | 0.92287  | 0.681028 |
| H2BK12ac+H3K27ac+H3K4me3+H3K9ac     | 0.922868 | 0.676883 |
| H2AK5ac+H3K27ac+H3K27me3+H4K91ac    | 0.922803 | 0.680593 |
| H3K27ac+H3K27me3+H3K4me1+H3K56ac    | 0.922787 | 0.686107 |
| H3K27me3+H3K4me1+H3K4me2+H3K79me1   | 0.922784 | 0.676709 |
| H3K27me3+H3K4ac+H3K79me1+H3K79me2   | 0.922783 | 0.690289 |
| H3K27ac+H3K36me3+H3K4me1+H4K8ac     | 0.922763 | 0.67893  |
| H2BK20ac+H3K27me3+H3K79me1+H4K91ac  | 0.922759 | 0.696753 |
| H3K23ac+H3K27me3+H3K4me2+H4K5ac     | 0.922733 | 0.675712 |
| H3K27ac+H3K27me3+H3K4me1+H4K5ac     | 0.922722 | 0.690312 |
| H3K23ac+H3K27ac+H3K27me3+H3K4me1    | 0.922687 | 0.686931 |
| H2BK20ac+H3K27ac+H3K4me2+H4K8ac     | 0.922685 | 0.676861 |

|                                     |          |          |
|-------------------------------------|----------|----------|
| H3K27me3+H3K79me1+H3K9me3+H4K5ac    | 0.922598 | 0.683882 |
| H3K27ac+H3K4me3+H3K9me3+H4K91ac     | 0.922537 | 0.692612 |
| H3K27me3+H3K36me3+H3K4ac+H3K79me1   | 0.922531 | 0.687465 |
| H3K27ac+H3K79me1+H4K20me1+H4K8ac    | 0.922492 | 0.677385 |
| H3K27me3+H3K4me2+H3K9ac+H3K9me3     | 0.922479 | 0.679952 |
| H3K14ac+H3K27ac+H3K4me1+H3K56ac     | 0.922397 | 0.67666  |
| H3K27me3+H3K4me2+H3K56ac+H3K9ac     | 0.922282 | 0.686501 |
| H3K27ac+H3K4ac+H3K4me2+H4K8ac       | 0.922239 | 0.684678 |
| H2BK120ac+H3K27ac+H3K4me1+H3K56ac   | 0.922184 | 0.691133 |
| H2BK15ac+H3K23ac+H3K27ac+H3K27me3   | 0.922184 | 0.704136 |
| H2AK5ac+H3K14ac+H3K27me3+H3K79me1   | 0.92215  | 0.673516 |
| H3K18ac+H3K27ac+H3K9me3+H4K8ac      | 0.922138 | 0.69209  |
| H3K23ac+H3K27ac+H3K27me3+H4K20me1   | 0.922122 | 0.68037  |
| H2AK5ac+H2BK12ac+H3K27ac+H3K4me3    | 0.922081 | 0.679704 |
| H3K27ac+H3K27me3+H3K9me3+H4K91ac    | 0.922077 | 0.68399  |
| H3K23ac+H3K27me3+H3K79me1+H3K9me3   | 0.92205  | 0.680391 |
| H3K14ac+H3K27ac+H3K79me1+H4K8ac     | 0.922035 | 0.683907 |
| H2BK12ac+H3K27ac+H3K4me2+H4K8ac     | 0.922031 | 0.681013 |
| H3K14ac+H3K27me3+H3K4ac+H3K79me1    | 0.922016 | 0.679052 |
| H3K27me3+H3K4me2+H3K4me3+H4K5ac     | 0.921998 | 0.685504 |
| H3K27ac+H3K4me2+H4K20me1+H4K8ac     | 0.921986 | 0.70146  |
| H2BK20ac+H3K27me3+H3K56ac+H3K79me1  | 0.921979 | 0.693734 |
| H3K27me3+H3K4me2+H3K9ac+H4K20me1    | 0.921928 | 0.690496 |
| H3K23ac+H3K27ac+H3K27me3+H3K9me3    | 0.92191  | 0.675212 |
| H3K23ac+H3K27ac+H3K4me1+H4K8ac      | 0.921893 | 0.685358 |
| H2BK20ac+H3K9ac+H3K9me3+H4K8ac      | 0.921846 | 0.684475 |
| H2BK20ac+H3K27me3+H3K79me1+H3K9me3  | 0.921845 | 0.676477 |
| H2BK20ac+H3K27me3+H3K36me3+H3K79me1 | 0.921783 | 0.676141 |
| H3K27me3+H3K4me3+H3K79me2+H3K9ac    | 0.921765 | 0.678182 |
| H3K23ac+H3K27ac+H3K4me2+H4K8ac      | 0.921754 | 0.694687 |
| H2AK5ac+H3K27ac+H3K27me3+H3K4me1    | 0.921739 | 0.681978 |
| H3K27me3+H3K36me3+H3K4me2+H3K79me1  | 0.921734 | 0.682081 |
| H3K27me3+H3K4me2+H3K79me1+H3K79me2  | 0.921732 | 0.676064 |
| H3K27ac+H3K9ac+H3K9me3+H4K91ac      | 0.921698 | 0.677342 |
| H3K18ac+H3K27ac+H3K9ac+H3K9me3      | 0.921673 | 0.67431  |
| H3K18ac+H3K27me3+H3K4me2+H3K9ac     | 0.921646 | 0.679143 |
| H3K27me3+H3K56ac+H3K79me1+H3K79me2  | 0.921645 | 0.685852 |
| H3K14ac+H3K27ac+H3K4me2+H4K8ac      | 0.921622 | 0.675796 |
| H3K27ac+H3K4ac+H3K4me1+H3K9ac       | 0.921599 | 0.685135 |
| H3K27ac+H3K4ac+H3K4me2+H3K9ac       | 0.921591 | 0.679573 |
| H2BK15ac+H3K27me3+H3K4me3+H3K79me1  | 0.921553 | 0.688368 |
| H3K27me3+H3K4ac+H3K79me1+H3K9me3    | 0.921441 | 0.684806 |
| H2BK15ac+H3K27me3+H3K4me2+H4K5ac    | 0.921433 | 0.693124 |
| H2BK120ac+H3K27me3+H3K56ac+H3K79me1 | 0.92133  | 0.675192 |
| H3K27ac+H3K27me3+H3K56ac+H3K79me2   | 0.921229 | 0.685052 |
| H3K27ac+H3K27me3+H3K56ac+H4K20me1   | 0.921194 | 0.675873 |
| H3K14ac+H3K27ac+H3K27me3+H3K56ac    | 0.921178 | 0.680783 |
| H2BK15ac+H3K27ac+H3K4me1+H4K8ac     | 0.921082 | 0.678909 |
| H3K27ac+H3K79me1+H4K8ac+H4K91ac     | 0.92104  | 0.678929 |
| H2BK12ac+H3K27ac+H3K4me1+H3K79me1   | 0.921015 | 0.677651 |
| H2BK20ac+H3K27me3+H3K79me1+H3K79me2 | 0.920988 | 0.683195 |

|                                     |          |          |
|-------------------------------------|----------|----------|
| H2AK5ac+H3K23ac+H3K27ac+H3K4me3     | 0.920953 | 0.676639 |
| H2BK15ac+H3K27ac+H3K27me3+H3K56ac   | 0.920931 | 0.683447 |
| H3K4me1+H3K4me2+H3K79me1+H3K9ac     | 0.92086  | 0.678292 |
| H3K27me3+H3K56ac+H3K79me1+H4K20me1  | 0.920731 | 0.67534  |
| H3K27me3+H3K4ac+H3K79me1+H4K20me1   | 0.92073  | 0.685334 |
| H2AK5ac+H3K27me3+H3K9ac+H4K20me1    | 0.920663 | 0.661387 |
| H2AK5ac+H3K23ac+H3K27me3+H3K9ac     | 0.920548 | 0.68604  |
| H2AK5ac+H3K27me3+H3K79me2+H3K9ac    | 0.920474 | 0.672856 |
| H2BK12ac+H2BK20ac+H3K27me3+H3K79me1 | 0.92038  | 0.678093 |
| H2BK120ac+H2BK12ac+H3K27ac+H3K27me3 | 0.920364 | 0.675112 |
| H2AK5ac+H2BK120ac+H3K27me3+H3K9ac   | 0.919588 | 0.659763 |
| H2BK120ac+H2BK20ac+H3K27me3+H3K4me3 | 0.919533 | 0.656234 |
| H2BK120ac+H2BK15ac+H3K27ac+H3K9me3  | 0.918976 | 0.654932 |
| H2BK120ac+H3K23ac+H3K27ac+H3K9me3   | 0.918593 | 0.663585 |
| H2BK120ac+H2BK20ac+H3K27me3+H3K4me2 | 0.917309 | 0.668771 |
| H2BK15ac+H3K23ac+H3K27ac+H3K9ac     | 0.916996 | 0.659032 |
| H2BK120ac+H3K27ac+H3K27me3+H3K4ac   | 0.916912 | 0.656529 |
| H2AK5ac+H2BK15ac+H3K27me3+H3K9ac    | 0.916666 | 0.658718 |
| H2BK15ac+H3K27ac+H3K56ac+H4K8ac     | 0.916635 | 0.66702  |
| H2AK5ac+H2BK120ac+H3K27ac+H3K9ac    | 0.915949 | 0.661028 |
| H2BK20ac+H3K27ac+H4K8ac+H4K91ac     | 0.915204 | 0.656966 |
| H2AK5ac+H2BK12ac+H3K27ac+H3K9ac     | 0.914668 | 0.659302 |
| H2AK5ac+H3K27me3+H3K9ac+H3K9me3     | 0.914534 | 0.656281 |
| H3K27ac+H3K9ac+H4K8ac+H4K91ac       | 0.913763 | 0.659212 |
| H2BK120ac+H3K14ac+H3K27me3+H4K5ac   | 0.913683 | 0.671454 |
| H3K27ac+H3K9ac+H4K5ac+H4K8ac        | 0.913164 | 0.659357 |
| H2AK5ac+H3K14ac+H3K27ac+H3K56ac     | 0.913159 | 0.672097 |
| H2BK120ac+H2BK15ac+H3K27ac+H4K8ac   | 0.913045 | 0.663362 |
| H2AK5ac+H2BK20ac+H3K27ac+H3K27me3   | 0.912988 | 0.670462 |



Table S3: List of the fourteen enhancers  
used in luciferase reporter assays

|               |                          |
|---------------|--------------------------|
| eRNA+K27ac+_1 | chr1:95113004-95114612   |
| eRNA+K27ac+_2 | chr3:55363397-55365168   |
| eRNA+K27ac+_3 | chr4:55030444-55032243   |
| eRNA+K27ac+_4 | chr5:172204210-172205833 |
| eRNA+K27ac-_1 | chr2:106071039-106072921 |
| eRNA+K27ac-_2 | chr5:121427975-121429736 |
| eRNA+K27ac-_3 | chr5:38782762-38784543   |
| eRNA-K27ac+_1 | chr5:73495584-73497044   |
| eRNA-K27ac+_2 | chr8:39911413-39912513   |
| eRNA-K27ac+_3 | chr6:14881639-14882679   |
| eRNA-K27ac-_1 | chr2:15870650-15871999   |
| eRNA-K27ac-_2 | chr17:55320202-55321751  |
| eRNA-K27ac-_3 | chr12:46008884-46009933  |
| eRNA-K27ac-_4 | chr10:36571106-36573012  |
